# Long identical sequences found in multiple bacterial genomes reveal frequent and widespread exchange of genetic material between distant species.

Michael Sheinman<sup>a,b,1,\*</sup>, Ksenia Arkhipova<sup>a,1</sup>, Peter F. Arndt<sup>c</sup>, Bas E. Dutilh<sup>a</sup>, Rutger Hermsen<sup>a,2,\*</sup>, Florian Massip<sup>d,e,2,\*</sup>

<sup>a</sup>*Theoretical Biology and Bioinformatics, Utrecht University, Padualaan 8,3584 CH, Utrecht, The Netherlands*

<sup>b</sup>*Division of Molecular Carcinogenesis, the Netherlands Cancer Institute, Plesmanlaan 121, 1066 CX Amsterdam*

<sup>c</sup>*Max Planck Institute for Molecular Genetics, Ihnestr. 63/73, 14195 Berlin, Germany*

<sup>d</sup>*Berlin Institute for Medical Systems Biology, Max Delbrück Center, Berlin, Germany*

<sup>e</sup>*Université de Lyon, Université Lyon 1, CNRS, Laboratoire de Biométrie et Biologie Evolutive UMR 5558, Villeurbanne, France*

---

## Abstract

Horizontal transfer of genomic elements is an essential force that shapes microbial genome evolution. Horizontal Gene Transfer (HGT) occurs via various mechanisms and has been studied in detail for a variety of systems. However, a coarse-grained, global picture of HGT in the microbial world is still missing. One reason is the difficulty to process large amounts of genomic microbial data to find and characterise HGT events, especially for highly distant organisms. Here, we exploit the fact that HGT between distant species creates long identical DNA sequences in genomes of distant species, which can be found efficiently using alignment-free methods. We analysed over 90 000 bacterial genomes and thus identified over 100 000 events of HGT. We further developed a mathematical model to analyse the statistical properties of those long exact matches and thus estimate the transfer rate between any pair of taxa. Our results demonstrate that long-distance gene exchange (across phyla) is very frequent, as more than 8% of the bacterial genomes analysed have been involved in at least one such event. Finally, we confirm that the function of the transferred sequences strongly impact the transfer rate, as we observe a 3.5 order of magnitude variation between the most and the least transferred categories. Overall, we provide a unique view of horizontal transfer across the bacterial tree of life, illuminating a fundamental process driving bacterial evolution.

---

---

\*Corresponding author

*Email addresses:* [mishashe@gmail.com](mailto:mishashe@gmail.com) (Michael Sheinman), [r.hermsen@uu.nl](mailto:r.hermsen@uu.nl) (Rutger Hermsen), [florian.massip@gmail.com](mailto:florian.massip@gmail.com) (Florian Massip)

<sup>1</sup>These authors contributed equally

<sup>2</sup>These authors contributed equally

## 1 **1. Introduction**

2 Microbial genomes are subject to loss and gain of genetic material from other organisms [5, 60], via  
3 a variety of mechanisms: conjugation, transduction, and transformation, collectively known as horizontal  
4 gene transfer (HGT) [70, 26]. The exchange of genetic material is a key driver of microbial evolution  
5 that allows rapid adaptation to local niches [6]. Gene acquisition via HGT can provide microbes with  
6 adaptive traits, conferring a selective advantage in particular conditions [34, 43], and eliminates deleterious  
7 mutations, resolving the paradox of Muller’s ratchet [71].

8 Since the discovery of HGT more than 50 years ago [24] many cases of HGT have been intensively  
9 studied. Several methods to infer HGT rely on identifying shifts in (oligo-)nucleotide compositions along  
10 genomes [63]. Other methods are based on discrepancies between gene and species distances, *i.e.*, surprising  
11 similarity between genomic regions belonging to distant organisms that cannot be satisfactorily explained  
12 by their conservation [38, 50, 35, 52, 18, 19, 9]. For example, genomes from different genera are typically  
13 up to 60 – 70% identical, meaning that one in every three base pairs is expected to differ. The presence of  
14 regions in different genomes that are significantly more similar than expected can be interpreted as evidence  
15 of recent HGT events. Using such methods the transfer of drug- and metal-resistance genes [31], toxin-  
16 antitoxin systems [73] and virulence factors [22, 51] have been observed numerous times. It is also known  
17 that some bacterial taxa, such as members of the family of *Enterobacteriaceae* [20], are frequently involved  
18 in HGT, whereas other groups, such as extracellular pathogens from the *Mycobacterium* genus [21], rarely  
19 are. Notably, the methods used in the detection and analysis of instances of HGT are computationally  
20 complex and can be used to discover HGT event in at most hundreds of genomes simultaneously. Conse-  
21 quently, a general overview of the diversity and abundance of transferred functions, as well as the extent  
22 of involvement across all known bacterial taxa in HGT, is still lacking. In particular, exchanges of genetic  
23 material between distant species – because discovering such long-distance transfers requires the application  
24 of computationally costly methods to very large numbers of genomes – are rarely studied.

25 In this study we use a novel approach to address these questions. Our method is based on the analysis  
26 of long exact sequence matches found in the genomes of distant bacteria. Exact matches can be identified  
27 very efficiently using alignment-free algorithms [17], which makes the method much faster than previous  
28 methods that rely on alignment tools. This allows us to study transfer events between 1 343 042 bacterial  
29 contigs, belonging to 93 481 genomes, encompassing a total of 0.4 Tbp. We identified all long exact matches  
30 shared between bacterial genomes from different genera. Such long matches are unlikely to be vertically

31 inherited, and we therefore assume that they result from HGT.

32 In a quarter of all bacterial genomes, we detected HGT across family borders, and 8% participated  
33 in HGT across phyla. This shows that genetic material frequently crosses distant taxonomic borders. The  
34 length distribution of exact matches can be accounted for by a simple model that assumes that exact matches  
35 are continuously produced by transfer of genetic material and subsequently degraded by mutation. Fitting  
36 this model to empirical data allow us to estimate the effective rate at which HGT generates long sequence  
37 matches in distant organisms. Furthermore, the large number of transfer events identified allows us to  
38 conduct a functional analysis of horizontally transferred genes.

## 39 **2. Results**

### 40 *2.1. HGT detection using exact sequence matches*

41 We identified HGT events between distant bacterial taxa by detecting long exact sequence matches  
42 shared by pairs of genomes. We exploit that, in phylogenetically distant genome pairs, sequences that  
43 are shared by both genomes due to linear descent (orthologous sequences) have low sequence identity.  
44 Therefore long sequence matches in such orthologs are exceedingly rare. Generally, the average nucleotide  
45 sequence identity between bacterial genomes selected from different genera is at most 60 to 70% [61].  
46 In the absence of HGT, the probability of observing an exact match longer than 300 bp between a given  
47 pair of genomes is then extremely small (of the order of  $10^{-40}$  if we assume uniform divergence along the  
48 genomes). Thus, even if millions of genome pairs with such divergence are analysed, the probability to  
49 observe even one such a match remains extremely low, such that one does not expect to find a single hit of  
50 this size between any two bacterial genomes by chance.

51 Fig. 1 illustrates this point. In the dot-plot comparing the genome sequences of two *Enterobacteriaceae*,  
52 *Escherichia coli* and *Salmonella enterica* (Fig 1A), we observe numerous exact matches smaller than 300bp  
53 along the diagonal, revealing a conservation of the genomic architecture at the family level. Filtering out  
54 matches shorter than 300bp (Fig 1B) completely removes the diagonal line, confirming that exact matches  
55 in the orthologous sequences of these genomes are invariably short.

56 Because very long exact sequence matches are extremely unlikely in orthologs, those that do occur  
57 are most likely xenologs: sequences that are shared due to relatively recent events of HGT. As an example,  
58 Fig. 1C shows a dot plot comparable to Panel 1A, but now comparing the genomes of *Enterococcus faecium*  
59 and *Atopobium minulum*. No diagonal line is seen because these genomes belong to different phyla and

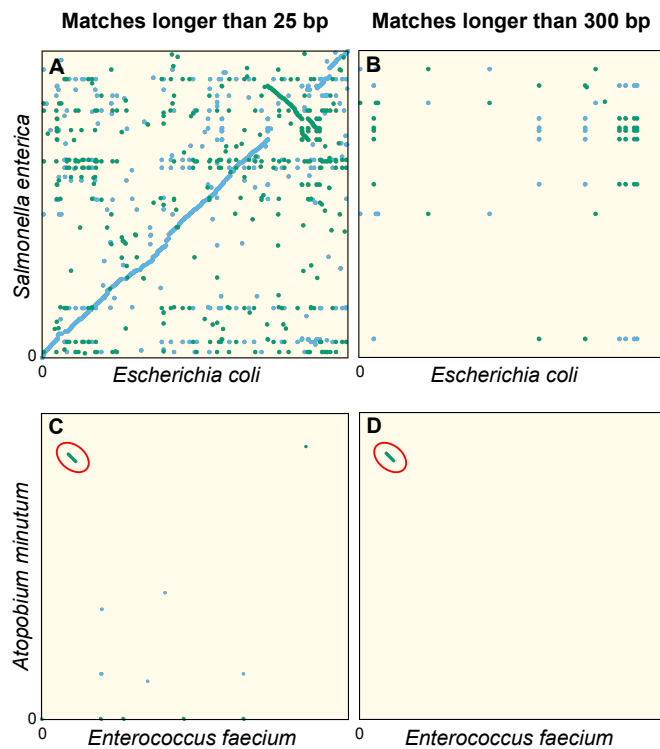

Figure 1: Dot plots of the exact sequence matches found in different pairs of distant bacteria. Matches are indicated as lines drawn with a wide stroke. Thus, short matches appear as dots. Blue lines indicate matches in the forward strand, green lines those in the reverse complement. **(A-B)** Full genomes of *Escherichia coli* *K-12* substr. *MG1655* (U00096.3) and *Salmonella enterica* (NC\_003198.1), which both belong to the family of *Enterobacteriaceae*. Panel A shows all matches longer than 25 bp. The sequence similarity and synteny of both genomes, by descent, is evident from the diagonal blue line. Panel B only shows matches longer than 300 bp. **(C-D)** Same as Panels A-B, but for the first 1.4 Mbp of *Enterococcus faecium* (NZ\_CP013009.1) and *Atopobium minutum* (NZ\_KB822533.1), which belong to different phyla, showing few matches longer than 25 bp (Panel C). Yet, a single match of 19 117 bp is found, as indicated with red ellipses in Panels C-D. The most parsimonious explanation for this long match is an event of horizontal gene transfer.

60 therefore have low sequence identity. Nevertheless, an exact match spanning 19 117 bp is found (diagonal  
61 green line highlighted by a red ellipse). The most parsimonious explanation for such a long match is a  
62 recent HGT event. In addition, the GC content of the match (55%), deviates strongly from that of both  
63 contigs (38.3% and 48.9%, respectively), another indication that this sequence originates from an HGT  
64 event [63]. Comparing the sequence of this exact match with all non-redundant GenBank CDS translations  
65 using `blastx` [1] we find very strong hits to VanB-type vancomycin resistance histidine, antirestriction  
66 protein (ArdA endonuclease), and an LtrC-family phage protein that is found in a large group of phages that  
67 infect Gram-positive bacteria [62]. Together, this suggests that the sequence was transferred by transduction  
68 and established in both bacteria aided by natural selection acting on the conferred vancomycin resistance.

69 In the following we assume that long identical DNA segments found in pairs of bacteria belonging to  
70 different genera reveal HGT. We stress, however, that a matching sequence may not have been transferred  
71 directly between the pair of lineages in which it was identified: more likely, it arrived in one or both lineages  
72 independently, for instance carried by a phage or another mobile genetic element that transferred the same  
73 genetic material to multiple lineages through independent interactions.

74 In the following, we restrict our study to matches longer than 300 bp to minimise the chance that those  
75 matches result from vertical inheritance. Because transferred sequence accumulate mutations, matches  
76 longer than 300 bp must originate from relatively recent events. Assuming a generation time of 10 hours [28],  
77 we estimate the detection horizon to be of the order of 1000 years ago (see Methods).

## 78 *2.2. Empirical length distributions of exact matches obey a power law*

79 To study HGT events found in pairs of genomes from different genera, we considered the statistical  
80 properties of  $r$ , the length of exact matches. To do so, we selected all bacterial genome fragments longer  
81 than  $10^5$  bp from the NCBI RefSeq database (1 343 042 in total), and identified all sequence matches in all  
82 pairs of sequences belonging to different genera ( $\approx 10^9$  pairs). We then analysed the distribution of the  
83 match lengths found, called the match-length distribution or MLD. A comparable approach has previously  
84 been applied successfully to analyse the evolution of eukaryotic genomes [25, 44, 45, 46].

85 While the vast majority of matches is very short ( $< 25$  bp), matches with a length of at least 300 bp  
86 do occur and contribute a thick tail to the MLD (Fig. 2). Strikingly, over many decades this tail is well  
87 described by a power law with exponent -3:

$$m(r) \sim r^{-3}. \quad (1)$$

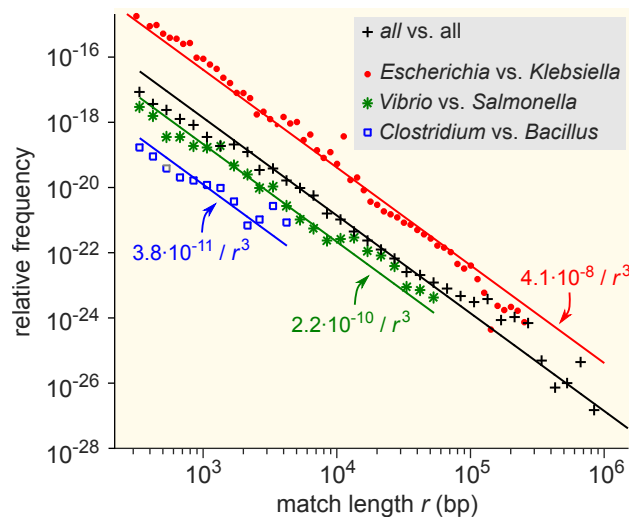

Figure 2: Match length distributions (MLDs) obtained by identifying exact sequence matches in pairs of genomes from different genera, based on matches between *Escherichia* and *Klebsiella* (red dots), *Vibrio* and *Salmonella* (green stars), and *Clostridium* and *Bacillus* (blue squares). Black plus signs represent the MLD obtained by combining the MLDs for *all* pairs of genera. Each MLD is normalised to account for differences in the number of available genomes in each genus (see Methods). Only the tails of the distributions (length  $r \geq 300$ ) are shown. Solid lines are fits of power-laws with exponent  $-3$  (Eq. (1)) with just a single free parameter.

88 The same power law was found if the analysis was restricted to matches between genomes from two partic-  
 89 ular genera (Fig. 2).

90 Note that the number of long matches found in a single pair of genomes is usually very small, prohibit-  
 91 ing a statistical analysis of their match length distribution. Hence, in this study we conduct all statistical  
 92 analyses at the level of genera. The MLD for a pair of genera  $G_1$  and  $G_2$  is defined as the normalized length  
 93 distribution of the matches found in all pairwise comparisons of a contig from  $G_1$  and a contig from  $G_2$  (see  
 94 Methods).

### 95 2.3. A simple model of HGT explains the power-law distribution of exact sequence matches

96 A simple model based on a minimal set of assumptions can account for the observed power law in the  
 97 MLD. Let us assume that, due to HGT, a given pair of bacterial genera A and B obtains new long exact  
 98 matches at a rate  $\rho$ , and that these new matches have a typical length  $K$  much larger than 1 bp. These  
 99 matches are established in certain fractions  $f_A$  and  $f_B$  of the populations of the genera, possibly aided  
 100 by natural selection. Subsequently, each match is continuously broken into shorter ones due to random  
 101 mutations that happen at a rate  $\mu$  per base pair in each genome. Then the length distribution of the broken,

102 shorter matches, resulting from all past HGT events, converges to a steady state that for  $1 \text{ bp} \ll r < K$  is  
103 given by the power law  $m(r) = A/r^{-3}$ , with prefactor:

$$A := K \frac{f_A f_B \rho}{L_A L_B \mu}, \quad (2)$$

104 consistent with Eq. (1). Here  $L_A$  (resp.  $L_B$ ) is the average genome length of all species in genus A (resp.  
105 B); see Methods. Hence, the power law observed when analysing pairs of bacterial taxa can be explained  
106 as the combined effect of many HGT events that occurred at different times in the past. While the model  
107 above makes several strongly simplifying assumptions, many of these can be relaxed without affecting the  
108 power-law behaviour; see Methods for an extended discussion.

109 In the model, the prefactor  $A$  quantifies the abundance of long exact matches and hence is a measure  
110 of the rate with which two taxa exchange genetic material. Eq.2 shows that  $A$  reflects the bare rate of the  
111 transfer events, the typical length of the transferred sequences, as well as the extent to which the transferred  
112 sequences are established in the receiving population, possibly aided by selection. By contrast, because of  
113 the normalisation of the MLD (see Methods),  $A$  does not scale with the number of genomes in the genera  
114 being compared and is thus robust to sampling noise, so that the value of  $A$  can be used to study the variation  
115 in HGT rate between genera.

#### 116 2.4. Long-distance gene exchange is a widespread mechanism in the bacterial domain

117 The analysis above has allowed us to identify a large number of HGT events. In addition, the derivations  
118 in the previous section provide a method to quantify the effective HGT rate between any two taxa by  
119 measuring the prefactor  $A$ . As Supp. file 1 (resp. Supp. file 2), we provide the value of  $A$  for all pairs  
120 of families (genera). Using these methods, we then studied the HGT rate between all pairs of bacterial  
121 families in detail.

122 Fig. 3 plots the prefactors  $A$  for all pair of families. Families for which the available sequence data  
123 totals less than  $10^7$  bp were filtered out since in such scarce datasets, typically no HGT is detected (Fig. S1),  
124 and the prefactor cannot reliably be estimated (see Supp. File 3 for the total length of all families). A first  
125 visual inspection of the heatmap reveals that the HGT rate varies drastically (from  $10^{-16}$  to  $10^{-8}$ ) from one  
126 pair to another (Fig. 3). First, the large squares on the diagonal of the heatmap indicate that HGT occurs  
127 more frequently between taxonomically related families. This is especially apparent for well-represented  
128 phyla including *Bacteroidetes*, *Proteobacteria*, *Firmicutes*, and *Actinobacteria*. Yet, we also observe a high  
129 transfer rate between many families belonging to very distant phyla, indicating that transfer events across

130 phyla are also frequent. Notably, we find that some families present a highly elevated HGT rate across  
131 the phylogeny; these families are visible in the heatmap (Fig. 3) as long bright lines, both vertical and  
132 horizontal.

133 We studied the HGT rate variations in more detail in a restricted dataset which included only long  
134 contigs ( $> 10^6$  bp) to reduce the risk of potential artefacts (see Methods). This dataset still comprises  
135 138,273 matches longer than 300bp.

136 The analysis of the restricted dataset reveals the extent of HGT in bacteria, even between distant species  
137 (Fig. 4). Indeed, we find that 32.6% of species have exchanged genetic material with a species from a  
138 different family in the last  $\sim 1000$  years. Moreover, we find that 8% of species have exchanged genetic  
139 material with a species from a different phylum. Finally, the species involved in these distant exchanges are  
140 spread across the phylogenetic tree: the species involved in long-distance transfers belong to 19 different  
141 phyla (out of 34).

142 The data also unveil that the propensity of species to exchange genetic material is very heterogeneous,  
143 and varies dramatically between closely related classes. For instance, within the phylum *Firmicutes*, we  
144 find classes in which we detected HGT in only a small percentage of species (30% in the *Negativicutes*),  
145 while in other classes we find events in almost all species ( $> 90\%$  in *Tissierellia*, Fig. 4 and Supp. file 4).  
146 This trend can be observed in most of the phyla and raises the question of which species features drive HGT  
147 rate variations.

#### 148 2.5. The rate of HGT decreases with taxonomic distance

149 To better understand the causes of the large variations in transfer rate between different families, we  
150 next studied the effect of biological and environmental properties on the HGT rate.

151 First, we assessed the impact of the taxonomic distance between genera on the HGT rate. To do so,  
152 we computed the prefactor  $A$  for pairs of genera at various taxonomical distances (Fig 5). On average this  
153 prefactor decreases by orders of magnitude as the taxonomic distance between the genera increases (inset  
154 of Fig 5). In particular, the average prefactor obtained when considering genera from the same family is  
155 more than three orders of magnitude higher than when considering genera from different phyla. These  
156 results support the notion that the divergence between organisms plays an important role in the rate of HGT  
157 between them [53, 7, 49, 27, 12, 15, 2] (see also Fig. S2). Note however that a lower effective rate of HGT  
158 can be due to a lower transfer rate of genetic material and/or a more limited fixation in the receiving genome,  
159 and the model cannot distinguish those two scenarios.



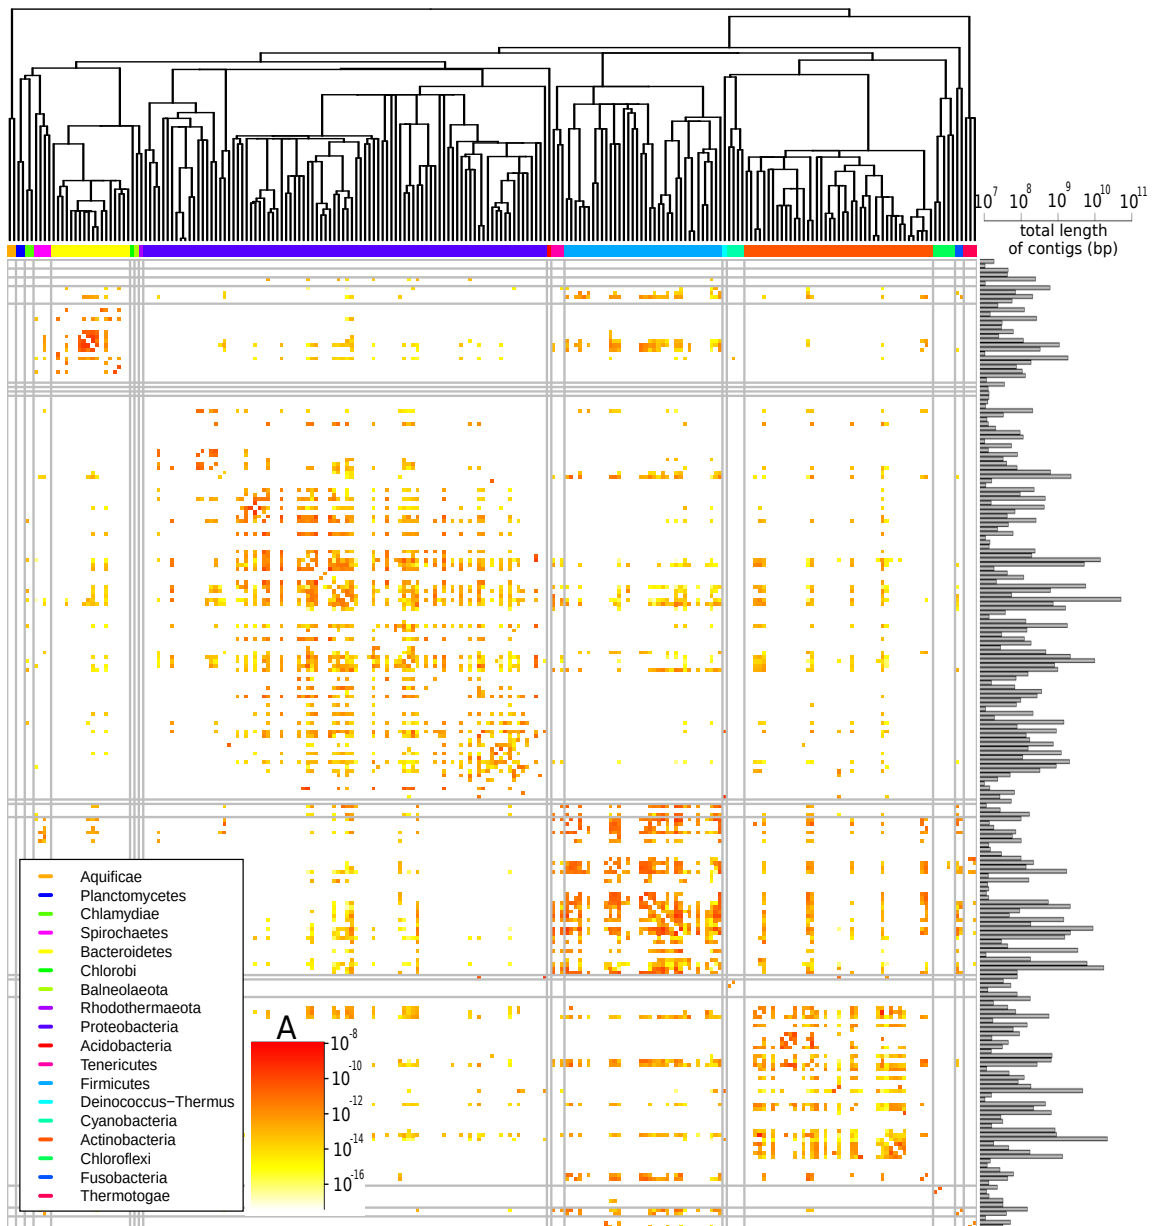

Figure 3: Effective pairwise HGT rate at the family level. For each pair of families the prefactor  $A$  is displayed (decimal logarithmic scale, see colorbar and Supp. file 1). The phylogenetic tree of bacterial families, taken from [37], is shown at the top. Phyla are indicated with coloured bars next to the upper axes of the heatmap (see legend). On the diagonal the values are set to zero. Black vertical and horizontal lines represent borders between phyla. The barplot on the right side of the heatmap shows the cumulative genome sizes of each family (decimal logarithmic scale).

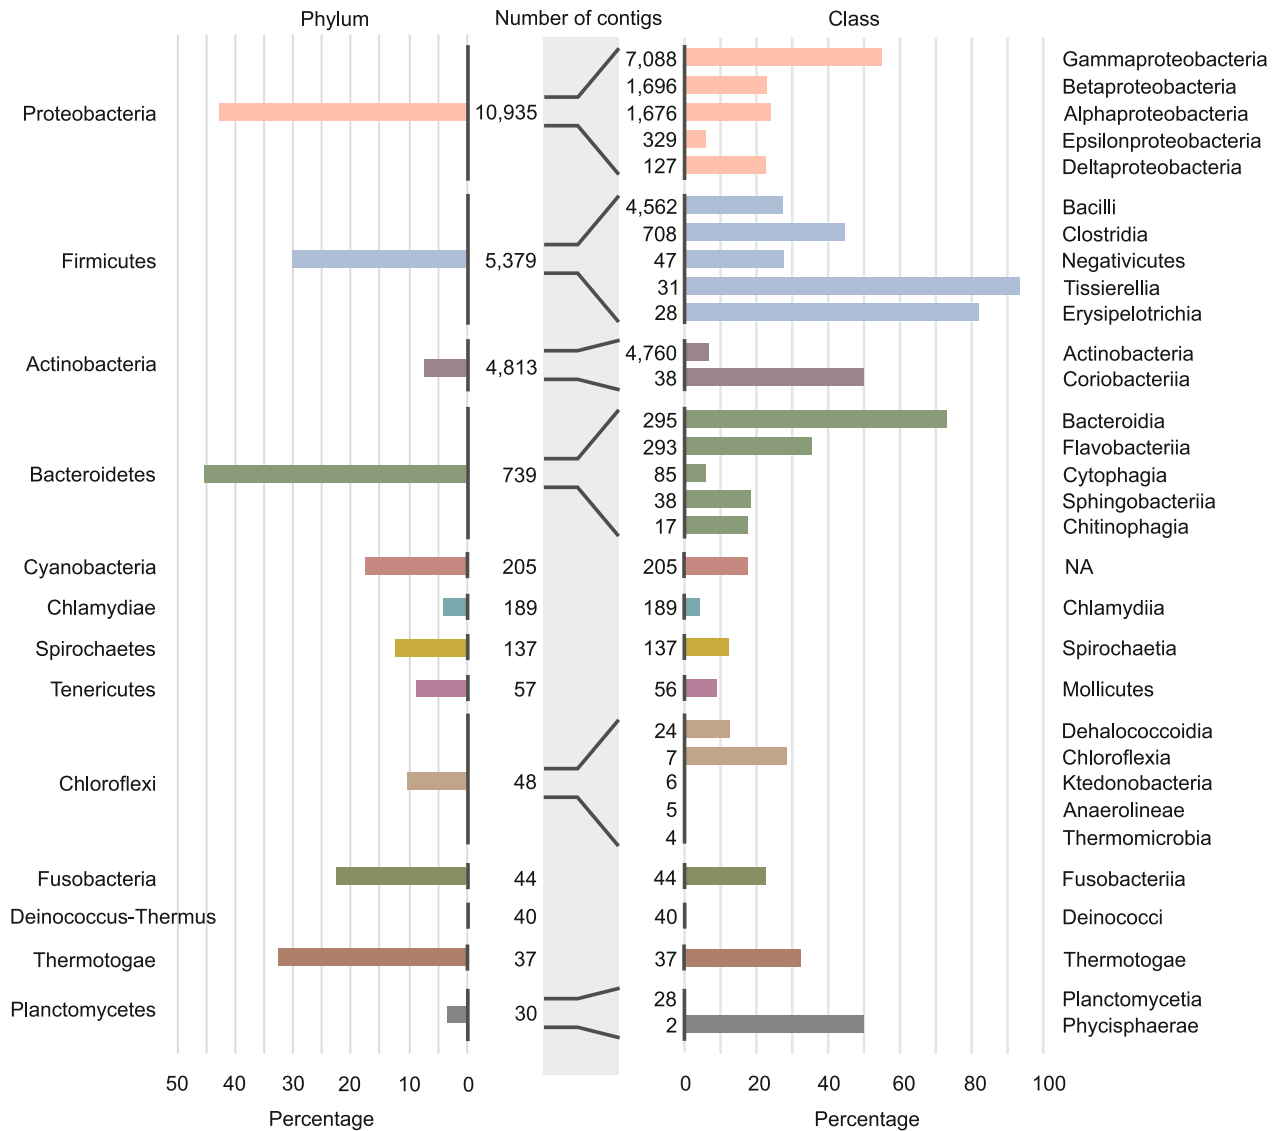

Figure 4: Involvement of different phyla and classes of bacteria long-distance HGT. Percentage of contigs involved in at least one long distance HGT event grouped at phylum level (left panel) and at classes level (right panel). Note that only the classes with the largest numbers of contigs are shown in the figure (see Supp. file 4 for all data). Numbers of contigs belonging to the phyla and classes are given in the middle part of figure.

160 To further explore the factors that influence the value of  $A$  we calculated MLDs for sets of genera from  
 161 different ecological environments: gut, soil, or marine (Fig. S3), regardless of their taxonomic distance. Our  
 162 results suggest that the effective rate of HGT is about 1 000 times higher among gut bacteria than among  
 163 marine bacteria. This pattern is observed both for the rates of HGT within ecological environments (*i.e.*,  
 164 HGT among gut bacteria vs. among marine bacteria) and the rates of crossing ecological environments  
 165 (*i.e.*, HGT between gut and soil bacteria versus between marine and soil bacteria). The soil bacteria take

166 an intermediate position between the gut and the marine bacteria. Moreover, bacteria from the same en-  
 167 vironment tend to share more matches than bacteria from different environments, consistent with previous  
 168 analyses [69].

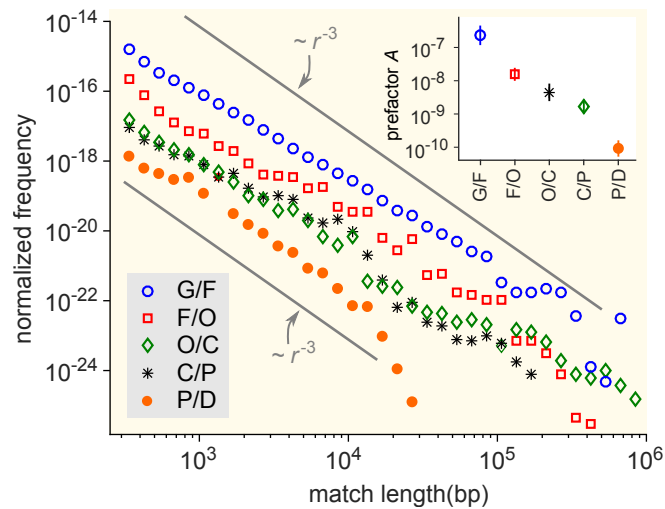

Figure 5: Distribution of matches lengths resulting from comparison of genera at a given taxonomic distance. G/F (blue circles): All pairwise comparison of genera from the same family; F/O (red squares) matches between genera of different families but in the same order; O/C (green diamonds), different orders but same class; C/P (black stars) different classes but same phylum; P/D (red circles) different phylum but same domain. The gray lines indicate the power-law dependence  $m(r) = Ar^{-3}$ . Inset: prefactor A for each of the distributions in the main figure. The prefactor decrease by orders of magnitude as the taxonomic distance increases.

169 A similar analysis demonstrates that the HGT propensity among gram-positive bacteria and among  
 170 gram-negative bacteria is much larger than between these groups (see Fig. S4). The groups of bacteria with  
 171 GC poor and GC rich genomes exhibit a similar pattern (see Fig. S5). We note however, that all these  
 172 factors correlate with each other [30]. From our analysis, the contribution of each factor to the effective rate  
 173 of HGT therefore remains unclear.

## 174 2.6. Large variation in the HGT rates between different categories of genes.

175 To better understand the factors that explain variations in observed HGT rates, we next conducted a  
 176 functional analysis of transferred sequences. To functionally annotate the transferred sequences, we first  
 177 queried twelve databases, each specifically dedicated to genes associated with a particular function (see  
 178 Table S1). Comparing to a randomised set of sequences (see Methods) reveals that the gene functions of  
 179 the transferred sequences strongly impact the transfer rate, as we observe a 3.5 order of magnitude variation  
 180 between the most and the least transferred categories (Fig. 6 and Table S1).

181 More specifically, antibiotic and metal resistance genes are among the most widely transferred classes  
182 of genes (resp. 37× and 4× enrichment compared to random expectation), in good agreement with previous  
183 evidence [31, 74, 23]. The enrichment of resistance genes is expected since their functions are strongly  
184 beneficial for bacterial populations under specific, transient conditions. Interestingly, genes providing re-  
185 sistance against tetracycline and sulfonamide antibiotics — the oldest groups of antibiotics in use — are  
186 the most enriched (see the full list in Supp. file 5). In addition, we also find a strong enrichment among the  
187 transferred genes of genes classified as integrative and conjugative elements, suggesting that these genes  
188 mediated the HGT events [57, 49]. In contrast, exotoxins and small regulatory RNAs are the least trans-  
189 ferred genes ( $\approx 100\times$  depletion). More generally, genes in the wider “Transport proteins” and “Enzymes”  
190 categories are strongly underrepresented in the detected HGT events.

191 To obtain a better understanding of the function of the transferred sequences, we also annotated the  
192 transferred sequences using SEED Subsystems [55] (Methods). While the 12 curated databases queried  
193 above are more complete and accurate on their specific domains, using the SEED Subsystem allows to test  
194 for over- or underrepresentation of a broader set of functions. The results of this second method are in good  
195 agreement with the database queries as the broad categories linked to “Phages, Prophages, Transposable  
196 elements, Plasmids”, and to “Virulence, Disease and Defense” are found to be the most enriched, although  
197 with a smaller enrichment (4.3 and 2.5 fold enrichment respectively, see Supp. file 6).

198 In addition to previously known enriched functions, we also discovered a strong enrichment (2.8×  
199 compared to the control, conditional test adjusted  $p$ -value  $< 10^{-16}$ , see Methods) for genes in the “iron  
200 metabolism” class. Indeed, a wide range of iron transporters, parts of siderophore and enzymes of its  
201 biosynthesis appeared in our HGT database, in line with previous analysis focusing on cheese microbial  
202 communities [4]. Hence, the results show that the horizontal transfer of genes related to iron metabolism  
203 occurs in a wide set of species and is not restricted to species found in cheese microbial communities. No-  
204 tably, the proteins in the “iron metabolism” functional category can be identified in transferred sequences  
205 belonging to 6 different bacterial phyla.

206 Among the enriched SEED subsystem categories, another interesting example is the enrichment for  
207 genes in the “flagellar motility” category (5.49× compared to the control, conditional test adjusted  $p$ -value  
208  $< 10^{-16}$ ). The flagellum is a complex multi-protein locomotor organ of bacteria [42] that has been found  
209 even in non-motile species [29]. An interesting feature of flagella is their own protein export system, which  
210 enables transfer of extracellular flagellar proteins outside of bacterial cells [48]. We found that the exact

211 matches code for a set of proteins of this export system. This result is supported by the recent finding that  
212 flagellin glycosylation islands can be transferred [16]. The frequent transfer of flagellar genes, combined  
213 with the fact that flagellar genes have been found even in non-motile species [29] could indicate that the  
214 export system of the flagella takes part in transport of other compounds, such as toxic chemicals.

215 Overall, the above findings confirm the strong enrichment of resistance genes among HGT events and  
216 validate the good resolution of our methods, and its power at shedding a new light on the properties of  
217 horizontal gene transfer.

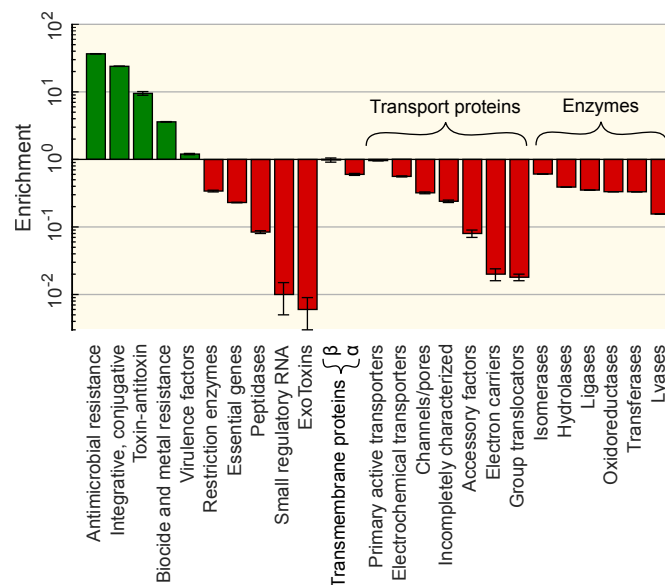

Figure 6: Functional enrichment of the sequences involved in HGT. Enrichment for each gene category (vertical axis) are computed relative to the random control for each set of genes from a certain category from the appropriate database (see Methods). Enrichment for gene resistance against different types of antibiotics and different biocides can be found in Supp. file 5.

### 218 3. Discussion

219 In this study, we developed a computationally efficient method to identify recent HGT events. This  
220 method provided an unprecedentedly large database of horizontal gene transfer events between any two  
221 genera in our database of 93 481 organisms. Our analysis reveals that HGT between distant species is  
222 extremely common in the bacterial world, with 32.6% percentage of organisms having taken part in an  
223 event that crossed genus boundaries in the last  $\sim$  1000 years. While a similar analysis has been conducted  
224 on a much smaller dataset (about 2, 300 organisms) Smillie et al. [69], this study is, to our knowledge, the  
225 first to provide an extensive description of HGT in the microbial world at this scale.

226 One striking result of our analysis is the finding that HGT is also common between very distant organ-  
227 isms. Indeed, 8% of the organisms we studied have been involved in a transfer of genetic material with  
228 at least one bacteria from another phylum in the last  $\sim 1000$  years. The molecular mechanisms at play  
229 in these long distance transfer events remain to be elucidated, for instance via a dedicated study targeting  
230 families with very high exchange rate we identified. Analysing the statistical properties of the exact se-  
231 quence matches in distantly related genera, we were able to quantify the effective rate of HGT for different  
232 comparisons (See Supp. File 1 and 2 for an estimation of all pairwise HGT rate at the family and at the  
233 genera level). Doing so, we find that the HGT rate varies dramatically between families (Fig. 3), posing  
234 the question of the factors influencing the HGT rate. Our study confirms that the HGT rate decreases with  
235 the divergence between the two bacteria exchanging material (Fig. 5 and Supp. Fig. S2), and is larger for  
236 pairs of bacteria with similar properties, such as ecological environment, GC content and Gram staining  
237 (Fig. S3,S4 and S5). However, since all these properties are correlated with each others, we could not  
238 disentangle the independent contribution of each of those features to the HGT rate.

239 Finally, our functional analysis of the transferred sequences shows that the function of a gene also  
240 strongly influences its chance of being exchanged (Fig. 4). As expected, genes conferring antibiotic resis-  
241 tance are the most widely transferred. In contrast, some functional categories are strongly underrepresented  
242 in the pool of transferred genes. For instance, genes that are involved in transcription, translation, and re-  
243 lated processes as well as those involved in metabolism are all depleted in our HGT database. One potential  
244 explanation could be that these genes generally co-evolve with their binding partners [33]. As such, their  
245 transfer would be beneficial to the host species only if both the effector and its binding partner were to be  
246 transferred together. As simultaneous HGT of several genes from different genome loci is very unlikely  
247 (unless they are co-localized), these genes are not prone to HGT. In addition, transcription, translation, and  
248 related processes are core functions that are ubiquitous in bacterial species. As such, transfer of such genes  
249 is unlikely to grant the receiving species a new function. Hence, transfers of housekeeping gene are less  
250 likely to confer a strong evolutionary advantage, which could explain their under-representation in the HGT  
251 dataset.

252 We found that the tail of the MLD follows a power law with exponent -3. This observation is particularly  
253 robust both empirically and theoretically. Indeed, the empirical MLDs we observe span between 2 and 4  
254 orders of magnitude, with an exponent always equal or close to  $-3$ . In addition, many of the simplifying  
255 assumptions of the model can be relaxed without breaking the specific power-law behaviour, provided that

256 HGT events have taken place continuously and at a non-zero rate up to the present time (see Methods).  
257 Whether HGT is a continuous process on evolutionary time scales or instead occurs in bursts has been a  
258 matter of debate [65, 33, 76], and burst of transfer event at some point in the past might explain some of the  
259 deviations from the  $-3$  power-law behaviour we observe (Fig. 5). In addition to HGT bursts, other complex  
260 evolutionary mechanisms that we do not consider in our model could in theory explain those deviations,  
261 including mechanisms of gene loss that allow bacteria to eliminate detrimental genes, or selfish genetic  
262 elements [72]. Finally, misclassifications of contigs as well as errors in genome assembly could bias the  
263 estimation of the effective HGT rate  $A$ .

264 Although it is widely accepted that bacteria often exchange their genes with closely related species [2]  
265 via HGT, our large-scale analysis of HGT shed new light on gene exchange in bacteria. Our analysis  
266 indicates that near 8% of all sequenced bacterial genomes share genes with at least one bacteria from other  
267 phylum, revealing the true scale of long distance gene transfer events. Evidently, long-distance exchange  
268 of genetic material is a recurrent and wide spread process, with specific statistical properties, suggesting  
269 that horizontal gene transfer plays a decisive role in maintaining the available genetic material throughout  
270 evolution.

## 271 4. Methods

### 272 4.1. Identification of exact matches

273 Reference bacterial sequences [54] were downloaded from the NCBI FTP server on 3 April 2017 to-  
274 gether with taxonomy tree files. We identified maximal exact matches using the MUMmer [17] software  
275 with the `maxmatch` option, which finds all the matches regardless of their uniqueness.

### 276 4.2. Empirical calculation of the MLD for pairs of genera and sets of genera

277 To analyse MLDs, we use all contigs longer than  $10^5$ bp. The MLD of a pair of genera  $i$  and  $j$  is defined  
278 as

$$m_{ij}(r) = \frac{M_{ij}(r)}{\ell_i \ell_j}, \quad (3)$$

279 where  $M_{ij}(r)$  is the number of matches of length  $r$  between all contigs of genus  $i$  and all contigs of genus  
280  $j$ .  $\ell_x$  is the total length of the available contigs of genus  $x$ . The expected number of matches found in the  
281 analysis of a pair of genera scales with the amount of sequence data available for these genera. Normalising  
282 by  $\ell_i \ell_j$  ensures that  $m_{ij}(r)$  does not scale with the database size, so that the  $m_{ij}(r)$  for different pairs of  
283 genera can be compared.

284 In Fig. 2, 5 and S2, S3, S4, S5 we show MLDs based on the matches found between pairs of sequences  
285 from two sets of genera. These MLDs were calculated as follows:

$$m(r) = \frac{\sum_{i,j} m_{ij}(r)}{\sum_{i,j} 1}, \quad (4)$$

286 where the index  $i$  runs over the genera from the first set and the index  $j$  runs over the genera from the second  
287 set.

#### 288 4.3. Analytical calculation of the MLD predicted by a simple model of HGT

289 A simple model based on a minimal set of assumptions can account for the observed power-law distri-  
290 butions. We first consider a particular event of HGT in which two bacterial genera gain a long exact match  
291 of length  $K \gg 1$  via HGT. After time  $t$ , the match is established in certain fractions of the populations of  
292 both genera, denoted  $f_1$  and  $f_2$ , respectively, possibly aided by natural selection. By this time, the match  
293 is expected to be broken into shorter ones due to random mutations, which we assume occur at a constant  
294 effective rate  $\mu = (\mu_1 + \mu_2)/2$  at each base pair, where  $\mu_1$  and  $\mu_2$  are the mutation rates of genus 1 and 2.

295 Suppose that we now sample  $n_1$  genomes from genus 1 and  $n_2$  from genus 2 and calculate the MLD  
296 according to equation 3. Then in the regime  $1 \ll r < K$  the contribution of the matches derived from this  
297 particular HGT event is given by [78, 44]:

$$m_{12}(r|t) = \frac{f_1 n_1 f_2 n_2 K (2\mu t)^2 e^{-2\mu t r}}{\ell_1 \ell_2} = \frac{f_1 f_2 K}{L_1 L_2} (2\mu t)^2 e^{-2\mu t r}. \quad (5)$$

298 Here,  $L_1$  and  $L_2$  are the average lengths of the genomes sampled from the two genera. Equation 5 shows  
299 that each individual HGT event contributes an exponential distribution to the MLD.

300 The full MLD is composed of contributions of many HGT events that happened at different times in the  
301 past. Assuming a constant HGT rate  $\rho$ , the HGT events are uniformly distributed over time, which results  
302 in the following full MLD [45]:

$$m_{12}(r) = \int_0^\infty \rho m_{12}(r|t) dt = \frac{f_1 f_2 K \rho}{L_1 L_2 \mu} \frac{1}{r^3}, \quad (6)$$

303 which yields the observed power-law with exponent -3.

304 The prefactor

$$A = K \frac{f_1 f_2 \rho}{L_1 L_2 \mu} \quad (7)$$

305 in Eq. (1) can be interpreted as an effective transfer rate per genome length. It depends on several parame-  
306 ters: the transfer rate from one species to another per genome length  $\rho/(L_1 L_2)$ , the length of the transferred



307 sequences  $K$ , the degree to which the sequence is establishment in the population of the two genera  $f_1$  and  
 308  $f_2$ , and the effective mutation rate  $\mu$ .

309 To fit the power law (1) to the empirical data, we binned the tail ( $r > 300$ ) of the empirical MLD (using  
 310 logarithmic binning), and then applied a linear regression with a fixed regression slope of -3 and a single  
 311 fitting parameter, *i.e.*, the intercept  $\ln(A)$ .

#### 312 4.4. Robustness of the power-law behaviour

313 For simplicity, the above argument makes several strong assumptions, including that  $\mu$ ,  $K$ ,  $f_1$  and  $f_2$   
 314 are the same for all HGT events and that these events are distributed uniformly over time. However, if  
 315 these assumptions are relaxed the power law proves to be remarkably robust. First, we could assume that  
 316 all of the above parameters differ between HGT events, according to some joint probability distribution  
 317  $P(K, \mu, f_1, f_2)$ . As long as this distribution itself does not depend on the time  $t$  of the event, equation 6 then  
 318 becomes

$$m_{12}(r) = \iiint\limits_0^\infty P(K, \mu, f_1, f_2) \int_0^\infty \rho m_{12}(r|t) dt dK d\mu df_1 df_2 = \frac{\rho}{L_1 L_2} \left\langle \frac{K f_1 f_2}{\mu} \right\rangle \frac{1}{r^3}, \quad (8)$$

319 where the angular brackets denote the expectation value. The power law remains, except that the prefactor  
 320 now represents an average over all possible parameter values. Second, we can relax the assumption that the  
 321 divergence time  $t$  is uniformly distributed (*i.e.*, that HGT events were equally likely at any time in the past).  
 322 In general, equation 6 should then be replaced by

$$m_{12}(r) = \int_0^\infty P_d(t) \rho m_{12}(r|t) dt, \quad (9)$$

323 in which  $P_d(t)$  is the divergence-time distribution. Previously, this distribution was assumed to equal 1,  
 324 but other possibilities can be explored. For example, if instead we assume that xenologous sequences are  
 325 slowly *removed* from genomes due to deletions, the divergence times may be exponentially suppressed,

$$P_d(t) = e^{-\lambda t}, \quad (10)$$

326 in which case equation 9 becomes:

$$m_{12}(r) = \int_0^\infty P_d(t) \rho m_{12}(r|t) dt = \frac{f_1 f_2 K \rho}{L_1 L_2 \mu} \left( r + \frac{\lambda}{2\mu} \right)^{-3}. \quad (11)$$

327 This MLD again has the familiar power-law tail in the regime  $r \gg \lambda/(2\mu)$ . Generally, if the divergence-time  
 328 distribution can be written as a Taylor series

$$P_d(t) = \sum_{i=0}^{\infty} \frac{a_i t^i}{i!}, \quad (12)$$

329 equation 9 evaluates to

$$m_{12}(r) = \frac{f_1 f_2 K}{L_1 L_2} \frac{\rho}{2\mu} \sum_{i=0}^{\infty} (i+1)(i+2) a_i r^{-3-i}. \quad (13)$$

330 The tail of this distribution is dominated by the first nonzero term in the series, because it has the largest  
331 exponent. Again this results in a power-law with exponent -3 provided  $a_0 = P_d(0)$  does not vanish. That  
332 is, an exponent of -3 is expected provided HGT events have taken place at a non-zero rate up to the present  
333 time [45, 46].

#### 334 4.5. Age-range estimation of the exact matches

335 According to the above model, the probability that a match of length  $r$  originates from an event that  
336 took place a time  $t$  ago is given by

$$p(t|r) = \rho m_{12}(r|t) / m_{12}(r) = r^3 \mu (2\mu t)^2 e^{-2\mu t r}. \quad (14)$$

337 The most likely time  $t_{ML}$  is found by setting the time-derivative of Eq 14 to zero, which results in

$$t_{ML} = (\mu r)^{-1}. \quad (15)$$

338 Above, we considered exact matches with a length  $r > 300$  bp. Only in sequences involved in rather  
339 recent HGT events such long matches are likely to occur, and hence the method can only detect recent  
340 events. Eq 15 can provide a rough estimate for the detection horizon of the method. To do so, we substitute  
341  $r = 300$  bp into Eq 15. Assuming a mutation rate  $\mu$  of  $10^{-9}$  per bp and per generation, this results in  
342 a detection horizon of  $t_{ML} \approx 10^6$  generations. Assuming a mean generation time in the wild of about  
343 10 hours [28], this corresponds to approximately 1000 years. That is to say, we estimate that the HGT  
344 events we detect date back to the past 1000 years. We stress, however, that both the mutation rate and the  
345 generation time can strongly vary from one species to the next; hence this estimate is highly uncertain.

346 By Eq 15, the event that created the match of 19 117 bp in Fig. 1C-D is dated back about 60 years ago,  
347 again with a large uncertainty. Vancomycin was discovered in 1952, but widespread usage started only in  
348 the 1980s, and resistant strains were first reported in 1986 [39].

#### 349 4.6. High-quality restricted dataset

350 To quantitatively study HGT rate variations, we restricted our analysis to a smaller and high quality  
351 dataset (see Methods) to reduce the risk of potential artefacts. The curated dataset encompasses only the  
352 exact sequence matches that stem from the comparison of contigs larger than  $10^6$  bp, since short contigs

353 are more likely to present assembly or species assignment errors, or to originate from plasmid DNA. The  
354 resulting dataset comprises 138,273 matches longer than 300bp.

355 We analysed exact sequence matches longer than 300bp between bacteria from different bacterial fam-  
356 ilies. Here we filter out all contigs smaller than 10<sup>6</sup>bp from the RefSeq database. For some organisms we  
357 suspect an erroneous taxonomic annotation, due to their high similarity to another species. Based on this we  
358 manually cleaned the results and removed exact matches between following accession numbers or groups  
359 of accession numbers with particular taxonomic annotation:

- 360 • Accession number NZ\_FFHQ01000001.1 and all *Enterococcus*
- 361 • Accession number NZ\_JOFP01000002.1 and accession number NZ\_FOTX01000001.1
- 362 • Accession number NZ\_LILA01000001.1' and all *Bacillus*
- 363 • Accession number NZ\_KQ961019.1' and all *Klebsiella*
- 364 • Accession number NZ\_LMVB01000001.1' and all *Bacillus*
- 365 • Pairwise comparisons between accession number NZ\_BDAP01000001.1, NZ\_JNYV01000002.1 and  
366 NZ\_JOAF01000003.1

367 This resulted in 138,273 unique matches.

#### 368 4.7. *Environment, Gram and GC content annotation*

369 Ecological annotation of bacterial genera is not well defined, and different members of the same genus  
370 can occupy different ecological niches. Nevertheless, using the text mining engine of Google we annotated  
371 some of the genera as predominately Marine, Gut and Soil. Using the same approach we identified Gram-  
372 positive, Gram-negative, GC-rich and GC-poor Genera. The results are summarised in file Supp. file 7.

373 Additional information about bacterial genomes (such as Gram classification or lifestyle) were collected  
374 from PATRIC database metadata [75].

#### 375 4.8. *Gene enrichment analyses*

376 To assess the enrichment of genes in the set of transferred sequences, we generated a set of control  
377 sequences as follow. For each match  $i$  present in  $w_i$  contigs, we randomly sampled without replacement a  
378 random sequences from each of those  $w_i$  contigs. This way, the control set takes into account the enrichment  
379 of certain species in the set of transferred sequences.

380 We analysed 12 different sets of genes: Acquired antibiotic resistant genes (ResFinder database [77]),  
381 Antibacterial Biocide and Metal Resistance Genes Database (BacMet database [56]), Integrative and con-  
382 jugative elements(ICEberg database [3]), Virulence factors(VFDB database [11]), Essential genes (DEG  
383 database [41]), Toxin-Antitoxin systems (TADB database [68]), Peptidases (MEROPS database [64]), Bac-  
384 terial Exotoxins for Human (DBETH database [10]), Transmembrane proteins (PDBTM database [36]), Re-  
385 striction Enzymes (REBASE database [66]), Bacterial small regulatory RNA genes (BSRD database [40]),  
386 the Transporter Classification Database (TCDB [67]) and Enzyme classification database (Brenda [58]).

387 For each set of genes from a database, using the `blast` toolkit [1], we calculate the total number of  
388 unique match-gene hit pairs. We weighted each hit to the database by  $w_i$  to obtain a total number of hits  $H$ :

$$H = \sum_i w_i n_i. \quad (16)$$

389 Assuming random sampling of organisms, the standard error of  $H$  is given by

$$\delta H \approx \sqrt{\sum_i w_i n_i^2}. \quad (17)$$

#### 390 4.9. SEED Subsystems ontological classification

391 To connect identifiers of the SEED Subsystems [55] to accession identifiers of NCBI nr database, two  
392 databases were downloaded: nr from NCBI [14] FTP and m5nr from MG-RAST [47] FTP servers (on  
393 17 January 2017). The homology search of proteins of nr database against m5nr was made using di-  
394 amond [8]. Proteins from the databases were considered to have similar function if they shared 90%  
395 of amino acid similarity over the full length. Additional files for SEED Subsystems (ontology\_map.gz,  
396 md5\_ontology\_map.gz, m5nr\_v1.ontology.all) were downloaded from MG-RAST FTP.

397 To annotate exact matches, open reading frames were predicted with Prodigal [32] and queried against  
398 nr using diamond. After that Subsystems classification was assigned to predicted proteins when possible.

399 To test for enrichment we conducted the “conditional test” [59]. Briefly, it assumes that the number  
400 of “successes” in the two conditions ( $H_1$  and  $H_2$ , for real data versus control) were sampled from Poisson  
401 distributions with parameters  $\lambda_1$  and  $\lambda_2$ , respectively. Under the null hypothesis  $\lambda_1 = \lambda_2$  the conditional  
402 probability for  $H_1$  given  $H_1 + H_2$  is the binomial distribution with parameters  $p = \lambda_1 / (\lambda_1 + \lambda_2) = 1/2$  and  
403  $n = H_1 + H_2$ . The test is simply a binomial test that determines whether the hypothesis  $p = 1/2$  can be  
404 rejected. In addition, using the Clopper–Pearson method [13], a 95% confidence interval was obtained for  
405  $p$ , which was converted to a confidence interval for the enrichment  $\lambda_1 / \lambda_2$ .

## References

- 406
- 407 [1] Altschul, S. F., Gish, W., Miller, W., Myers, E. W., and Lipman, D. J. (1990). Basic local alignment search tool. *Journal of*  
408 *molecular biology*, 215(3):403–410.
- 409 [2] Andam, C. P. and Gogarten, J. P. (2011). Biased gene transfer in microbial evolution. *Nature reviews. Microbiology*, 9(7):543.
- 410 [3] Bi, D., Xu, Z., Harrison, E. M., Tai, C., Wei, Y., He, X., Jia, S., Deng, Z., Rajakumar, K., and Ou, H.-Y. (2011). Iceberg: a  
411 web-based resource for integrative and conjugative elements found in bacteria. *Nucleic acids research*, 40(D1):D621–D626.
- 412 [4] Bonham, K. S., Wolfe, B. E., and Dutton, R. J. (2017). Extensive horizontal gene transfer in cheese-associated bacteria. *Elife*,  
413 6:e22144.
- 414 [5] Boto, L. (2010). Horizontal gene transfer in evolution: facts and challenges. *Proceedings of the Royal Society of London B:*  
415 *Biological Sciences*, 277(1683):819–827.
- 416 [6] Boucher, Y., Cordero, O. X., Takemura, A., Hunt, D. E., Schliep, K., Baptiste, E., Lopez, P., Tarr, C. L., and Polz, M. F. (2011).  
417 Local mobile gene pools rapidly cross species boundaries to create endemism within global vibrio cholerae populations. *MBio*,  
418 2(2):e00335–10.
- 419 [7] Brügger, K., Redder, P., She, Q., Confalonieri, F., Zivanovic, Y., and Garrett, R. A. (2002). Mobile elements in archaeal  
420 genomes. *FEMS microbiology letters*, 206(2):131–141.
- 421 [8] Buchfink, B., Xie, C., and Huson, D. H. (2015). Fast and sensitive protein alignment using diamond. *Nature methods*, 12(1):59.
- 422 [9] Caro-Quintero, A. and Konstantinidis, K. T. (2015). Inter-phylum hgt has shaped the metabolism of many mesophilic and  
423 anaerobic bacteria. *The ISME journal*, 9(4):958.
- 424 [10] Chakraborty, A., Ghosh, S., Chowdhary, G., Maulik, U., and Chakrabarti, S. (2011). Dbeth: a database of bacterial exotoxins  
425 for human. *Nucleic acids research*, 40(D1):D615–D620.
- 426 [11] Chen, L., Zheng, D., Liu, B., Yang, J., and Jin, Q. (2016). Vfdb 2016: hierarchical and refined dataset for big data analysis-10  
427 years on. *Nucleic acids research*, 44(D1):D694–D697.
- 428 [12] Choi, I.-G. and Kim, S.-H. (2007). Global extent of horizontal gene transfer. *Proceedings of the National Academy of*  
429 *Sciences*, 104(11):4489–4494.
- 430 [13] Clopper, C. J. and Pearson, E. S. (1934). The use of confidence or fiducial limits illustrated in the case of the binomial.  
431 *Biometrika*, 26(4):404–413.
- 432 [14] Coordinators, N. R. (2016). Database resources of the national center for biotechnology information. *Nucleic acids research*,  
433 44(Database issue):D7.
- 434 [15] Dagan, T., Artzy-Randrup, Y., and Martin, W. (2008). Modular networks and cumulative impact of lateral transfer in prokary-  
435 ote genome evolution. *Proceedings of the National Academy of Sciences*, 105(29):10039–10044.
- 436 [16] De Maayer, P. and Cowan, D. A. (2016). Flashy flagella: flagellin modification is relatively common and highly versatile  
437 among the enterobacteriaceae. *BMC genomics*, 17(1):377.
- 438 [17] Delcher, A. L., Phillippy, A., Carlton, J., and Salzberg, S. L. (2002). Fast algorithms for large-scale genome alignment and  
439 comparison. *Nucleic acids research*, 30(11):2478–2483.
- 440 [18] Dessimoz, C., Margadant, D., and Gonnet, G. (2008). Dlight–lateral gene transfer detection using pairwise evolutionary  
441 distances in a statistical framework. In *Research in Computational Molecular Biology*, pages 315–330. Springer.
- 442 [19] Dixit, P. D., Pang, T. Y., Studier, F. W., and Maslov, S. (2015). Recombinant transfer in the basic genome of Escherichia coli.

- 443 *Proceedings of the National Academy of Sciences*, 112(29):9070–9075.
- 444 [20] Doi, Y., Adams-Haduch, J. M., Peleg, A. Y., and D’Agata, E. M. (2012). The role of horizontal gene transfer in the dis-  
445 semination of extended-spectrum beta-lactamase-producing escherichia coli and klebsiella pneumoniae isolates in an endemic  
446 setting. *Diagnostic microbiology and infectious disease*, 74(1):34–38.
- 447 [21] Eldholm, V. and Balloux, F. (2016). Antimicrobial resistance in mycobacterium tuberculosis: the odd one out. *Trends in*  
448 *microbiology*, 24(8):637–648.
- 449 [22] Escobar-Páramo, P., Clermont, O., Blanc-Potard, A.-B., Bui, H., Le Bouguéneq, C., and Denamur, E. (2004). A specific  
450 genetic background is required for acquisition and expression of virulence factors in escherichia coli. *Molecular biology and*  
451 *evolution*, 21(6):1085–1094.
- 452 [23] Evans, D. R., Griffith, M. P., Sundermann, A. J., Shutt, K. A., Saul, M. I., Mustapha, M. M., Marsh, J. W., Cooper, V. S.,  
453 Harrison, L. H., and Van Tyne, D. (2020). Systematic detection of horizontal gene transfer across genera among multidrug-  
454 resistant bacteria in a single hospital. *Elife*, 9:e53886.
- 455 [24] Freeman, V. J. (1951). Studies on the virulence of bacteriophage-infected strains of corynebacterium diphtheriae. *Journal of*  
456 *bacteriology*, 61(6):675.
- 457 [25] Gao, K. and Miller, J. (2011). Algebraic distribution of segmental duplication lengths in whole-genome sequence self-  
458 alignments. *PloS one*, 6(7):e18464.
- 459 [26] García-Aljaro, C., Ballesté, E., and Muniesa, M. (2017). Beyond the canonical strategies of horizontal gene transfer in  
460 prokaryotes. *Current Opinion in Microbiology*, 38:95–105.
- 461 [27] Ge, F., Wang, L.-S., and Kim, J. (2005). The cobweb of life revealed by genome-scale estimates of horizontal gene transfer.  
462 *PLoS biology*, 3(10):e316.
- 463 [28] Gibson, B., Wilson, D. J., Feil, E., and Eyre-Walker, A. (2018). The distribution of bacterial doubling times in the wild.  
464 *Proceedings of the Royal Society B: Biological Sciences*, 285(1880):20180789.
- 465 [29] Gordienko, E. N., Kazanov, M. D., and Gelfand, M. S. (2013). Evolution of pan-genomes of escherichia coli, shigella spp.,  
466 and salmonella enterica. *Journal of bacteriology*, 195(12):2786–2792.
- 467 [30] Gupta, R. S. (2000). The phylogeny of proteobacteria: relationships to other eubacterial phyla and eukaryotes. *FEMS*  
468 *Microbiology Reviews*, 24(4):367–402.
- 469 [31] Huddlestone, J. R. (2014). Horizontal gene transfer in the human gastrointestinal tract: potential spread of antibiotic resistance  
470 genes. *Infection and drug resistance*, 7:167.
- 471 [32] Hyatt, D., Chen, G.-L., LoCascio, P. F., Land, M. L., Larimer, F. W., and Hauser, L. J. (2010). Prodigal: prokaryotic gene  
472 recognition and translation initiation site identification. *BMC bioinformatics*, 11(1):119.
- 473 [33] Jain, R., Rivera, M. C., and Lake, J. A. (1999). Horizontal gene transfer among genomes: the complexity hypothesis.  
474 *Proceedings of the National Academy of Sciences*, 96(7):3801–3806.
- 475 [34] Koonin, E. V. (2016). Horizontal gene transfer: essentiality and evolvability in prokaryotes, and roles in evolutionary transi-  
476 tions. *F1000Research*, 5.
- 477 [35] Koonin, E. V., Makarova, K. S., and Aravind, L. (2001). Horizontal gene transfer in prokaryotes: quantification and classifi-  
478 cation. *Annual Reviews in Microbiology*, 55(1):709–742.
- 479 [36] Kozma, D., Simon, I., and Tusnády, G. E. (2012). Pdbtm: Protein data bank of transmembrane proteins after 8 years. *Nucleic*  
480 *acids research*, 41(D1):D524–D529.

- 481 [37] Kumar, S., Stecher, G., Suleski, M., and Hedges, S. B. (2017). Timetree: a resource for timelines, timetrees, and divergence  
482 times. *Molecular Biology and Evolution*, 34(7):1812–1819.
- 483 [38] Lawrence, J. G. and Hartl, D. (1992). Inference of horizontal genetic transfer from molecular data: an approach using the  
484 bootstrap. *Genetics*, 131(3):753–760.
- 485 [39] Levine, D. P. (2006). Vancomycin: a history. *Clinical Infectious Diseases*, 42(Supplement\_1):S5–S12.
- 486 [40] Li, L., Huang, D., Cheung, M. K., Nong, W., Huang, Q., and Kwan, H. S. (2012). BsrD: a repository for bacterial small  
487 regulatory rna. *Nucleic acids research*, 41(D1):D233–D238.
- 488 [41] Luo, H., Lin, Y., Gao, F., Zhang, C.-T., and Zhang, R. (2013). Deg 10, an update of the database of essential genes that  
489 includes both protein-coding genes and noncoding genomic elements. *Nucleic acids research*, 42(D1):D574–D580.
- 490 [42] Macnab, R. M. (2004). Type iii flagellar protein export and flagellar assembly. *Biochimica et Biophysica Acta (BBA)-*  
491 *Molecular Cell Research*, 1694(1):207–217.
- 492 [43] Massey, R. C. and Wilson, D. J. (2017). Epidemiology: Promiscuous bacteria have staying power. *eLife*, 6:e30734.
- 493 [44] Massip, F. and Arndt, P. F. (2013). Neutral evolution of duplicated DNA: an evolutionary stick-breaking process causes  
494 scale-invariant behavior. *Physical review letters*, 110(14):148101.
- 495 [45] Massip, F., Sheinman, M., Schbath, S., and Arndt, P. F. (2015). How evolution of genomes is reflected in exact DNA sequence  
496 match statistics. *Molecular biology and evolution*, 32(2):524–535.
- 497 [46] Massip, F., Sheinman, M., Schbath, S., and Arndt, P. F. (2016). Comparing the statistical fate of paralogous and orthologous  
498 sequences. *Genetics*, 204(2):1.
- 499 [47] Meyer, F., Paarmann, D., D’Souza, M., Olson, R., Glass, E. M., Kubal, M., Paczian, T., Rodriguez, A., Stevens, R., Wilke,  
500 A., et al. (2008). The metagenomics rast server—a public resource for the automatic phylogenetic and functional analysis of  
501 metagenomes. *BMC bioinformatics*, 9(1):386.
- 502 [48] Minamino, T. (2014). Protein export through the bacterial flagellar type iii export pathway. *Biochimica et Biophysica Acta*  
503 *(BBA)-Molecular Cell Research*, 1843(8):1642–1648.
- 504 [49] Nakamura, Y., Itoh, T., Matsuda, H., and Gojobori, T. (2004). Biased biological functions of horizontally transferred genes  
505 in prokaryotic genomes. *Nature genetics*, 36(7):760–766.
- 506 [50] Nelson, K. E., Clayton, R. A., Gill, S. R., Gwinn, M. L., Dodson, R. J., Haft, D. H., Hickey, E. K., Peterson, J. D., Nelson,  
507 W. C., Ketchum, K. A., et al. (1999). Evidence for lateral gene transfer between archaea and bacteria from genome sequence of  
508 *thermotoga maritima*. *Nature*, 399(6734):323–329.
- 509 [51] Nogueira, T., Rankin, D. J., Touchon, M., Taddei, F., Brown, S. P., and Rocha, E. P. (2009). Horizontal gene transfer of the  
510 secretome drives the evolution of bacterial cooperation and virulence. *Current Biology*, 19(20):1683–1691.
- 511 [52] Novichkov, P. S., Omelchenko, M. V., Gelfand, M. S., Mironov, A. A., Wolf, Y. I., and Koonin, E. V. (2004). Genome-wide  
512 molecular clock and horizontal gene transfer in bacterial evolution. *Journal of bacteriology*, 186(19):6575–6585.
- 513 [53] Ochman, H., Lawrence, J. G., and Groisman, E. A. (2000). Lateral gene transfer and the nature of bacterial innovation.  
514 *Nature*, 405(6784):299–304.
- 515 [54] O’Leary, N. A., Wright, M. W., Brister, J. R., Ciufu, S., Haddad, D., McVeigh, R., Rajput, B., Robbertse, B., Smith-White, B.,  
516 Ako-Adjei, D., et al. (2015). Reference sequence (refseq) database at ncbi: current status, taxonomic expansion, and functional  
517 annotation. *Nucleic acids research*, page gkv1189.
- 518 [55] Overbeek, R., Begley, T., Butler, R. M., Choudhuri, J. V., Chuang, H.-Y., Cohoon, M., de Crécy-Lagard, V., Diaz, N., Disz,



- 519 T., Edwards, R., et al. (2005). The subsystems approach to genome annotation and its use in the project to annotate 1000  
520 genomes. *Nucleic acids research*, 33(17):5691–5702.
- 521 [56] Pal, C., Bengtsson-Palme, J., Rensing, C., Kristiansson, E., and Larsson, D. J. (2013). Bacmet: antibacterial biocide and  
522 metal resistance genes database. *Nucleic acids research*, 42(D1):D737–D743.
- 523 [57] Paquola, A. C., Asif, H., de Bragança Pereira, C. A., Feltes, B. C., Bonatto, D., Lima, W. C., and Menck, C. F. M. (2018).  
524 Horizontal gene transfer building prokaryote genomes: genes related to exchange between cell and environment are frequently  
525 transferred. *Journal of molecular evolution*, 86(3-4):190–203.
- 526 [58] Placzek, S., Schomburg, I., Chang, A., Jeske, L., Ulbrich, M., Tillack, J., and Schomburg, D. (2017). Brenda in 2017: new  
527 perspectives and new tools in brenda. *Nucleic acids research*, 45(D1):D380–D388.
- 528 [59] Przyborowski, J. and Wilenski, H. (1940). Homogeneity of results in testing samples from poisson series: With an application  
529 to testing clover seed for dodder. *Biometrika*, 31(3/4):313–323.
- 530 [60] Puigbò, P., Lobkovsky, A. E., Kristensen, D. M., Wolf, Y. I., and Koonin, E. V. (2014). Genomes in turmoil: quantification  
531 of genome dynamics in prokaryote supergenomes. *BMC biology*, 12(1):66.
- 532 [61] Qin, Q.-L., Xie, B.-B., Zhang, X.-Y., Chen, X.-L., Zhou, B.-C., Zhou, J., Oren, A., and Zhang, Y.-Z. (2014). A proposed  
533 genus boundary for the prokaryotes based on genomic insights. *Journal of bacteriology*, 196(12):2210–2215.
- 534 [62] Quiles-Puchalt, N., Tormo-Más, M. Á., Campoy, S., Toledo-Arana, A., Monedero, V., Lasa, Í., Novick, R. P., Christie,  
535 G. E., and Penades, J. R. (2013). A super-family of transcriptional activators regulates bacteriophage packaging and lysis in  
536 gram-positive bacteria. *Nucleic acids research*, 41(15):7260–7275.
- 537 [63] Ravenhall, M., Škunca, N., Lassalle, F., and Dessimoz, C. (2015). Inferring horizontal gene transfer. *PLoS computational*  
538 *biology*, 11(5):e1004095.
- 539 [64] Rawlings, N. D., Barrett, A. J., and Bateman, A. (2011). Merops: the database of proteolytic enzymes, their substrates and  
540 inhibitors. *Nucleic acids research*, 40(D1):D343–D350.
- 541 [65] Rivera, M. C., Jain, R., Moore, J. E., and Lake, J. A. (1998). Genomic evidence for two functionally distinct gene classes.  
542 *Proceedings of the National Academy of Sciences*, 95(11):6239–6244.
- 543 [66] Roberts, R. J., Vincze, T., Posfai, J., and Macelis, D. (2014). Rebase-a database for dna restriction and modification: enzymes,  
544 genes and genomes. *Nucleic acids research*, 43(D1):D298–D299.
- 545 [67] Saier, M. H., Reddy, V. S., Tsu, B. V., Ahmed, M. S., Li, C., and Moreno-Hagelsieb, G. (2016). The transporter classification  
546 database (tcdb): recent advances. *Nucleic Acids Research*, 44(D1):D372–D379.
- 547 [68] Shao, Y., Harrison, E. M., Bi, D., Tai, C., He, X., Ou, H.-Y., Rajakumar, K., and Deng, Z. (2010). Tadb: a web-based resource  
548 for type 2 toxin–antitoxin loci in bacteria and archaea. *Nucleic acids research*, 39(suppl\_1):D606–D611.
- 549 [69] Smillie, C. S., Smith, M. B., Friedman, J., Cordero, O. X., David, L. A., and Alm, E. J. (2011). Ecology drives a global  
550 network of gene exchange connecting the human microbiome. *Nature*, 480(7376):241.
- 551 [70] Soucy, S. M., Huang, J., and Gogarten, J. P. (2015). Horizontal gene transfer: building the web of life. *Nature Reviews*  
552 *Genetics*, 16(8):472–482.
- 553 [71] Takeuchi, N., Kaneko, K., and Koonin, E. V. (2014). Horizontal gene transfer can rescue prokaryotes from muller’s ratchet:  
554 benefit of dna from dead cells and population subdivision. *G3: Genes, Genomes, Genetics*, 4(2):325–339.
- 555 [72] van Dijk, B., Hogeweg, P., Doekes, H., and Takeuchi, N. (2020). Slightly beneficial genes are retained by evolving horizontal  
556 gene transfer despite selfish elements. *bioRxiv*.



- 557 [73] Van Melderden, L. and De Bast, M. S. (2009). Bacterial toxin–antitoxin systems: more than selfish entities? *PLoS genetics*,  
558 5(3):e1000437.
- 559 [74] von Wintersdorff, C. J., Penders, J., van Niekerk, J. M., Mills, N. D., Majumder, S., van Alphen, L. B., Savelkoul, P. H.,  
560 and Wolfs, P. F. (2016). Dissemination of antimicrobial resistance in microbial ecosystems through horizontal gene transfer.  
561 *Frontiers in microbiology*, 7:173.
- 562 [75] Wattam, A. R., Davis, J. J., Assaf, R., Boisvert, S., Brettin, T., Bun, C., Conrad, N., Dietrich, E. M., Disz, T., Gabbard,  
563 J. L., et al. (2016). Improvements to patric, the all-bacterial bioinformatics database and analysis resource center. *Nucleic acids*  
564 *research*, 45(D1):D535–D542.
- 565 [76] Wolf, Y. I. and Koonin, E. V. (2013). Genome reduction as the dominant mode of evolution. *Bioessays*, 35(9):829–837.
- 566 [77] Zankari, E., Hasman, H., Cosentino, S., Vestergaard, M., Rasmussen, S., Lund, O., Aarestrup, F. M., and Larsen, M. V.  
567 (2012). Identification of acquired antimicrobial resistance genes. *Journal of antimicrobial chemotherapy*, 67(11):2640–2644.
- 568 [78] Ziff, R. M. and McGrady, E. (1985). The kinetics of cluster fragmentation and depolymerisation. *Journal of Physics A:*  
569 *Mathematical and General*, 18(15):3027.
